# Supplementary material for: Characterization of Benign Breast Diseases and Association With Age, Hormonal Factors, and Family History of Breast Cancer Among Women in Sweden
Source: PubMed Central journal article supplement (PMC8233703; doi:10.1001/jamanetworkopen.2021.14716), 2021-06-25

## Supplementary Online Content

Johansson A, Christakou AE, Iftimi A, et al. Characterization of benign breast diseases and association with age, hormonal factors, and family history of breast cancer among women in Sweden. *JAMA Netw Open*. 2021;4(6):e2114716. doi:10.1001/jamanetworkopen.2021.14716

**eMethods.** Supplemental Methods

**eTable 1.** Classification of Benign Breast Diseases (BBDs)

**eTable 2.** Baseline Characteristics at Time of Recruitment of the KARMA Participants Included in the Study

**eTable 3.** Age Incidence Rates per 100 000 Person-Years in KARMA

**eFigure.** Risk of Benign Breast Diseases (BBDs) by Hormonal Factors

**This supplementary material has been provided by the authors to give readers additional information about their work.**

## eMethods. Supplemental Methods

### Classification of benign breast diseases (BBDs)

The pathology medical records on breast biopsies in SymPathy include a diagnosis code (morphology codes from the International Classification of Diseases for Oncology, ICD-O<sup>1</sup>, system and the Systematized Nomenclature of Medicine, SNOMED<sup>2</sup>), and describing diagnosis text. From the more specific diagnoses in SymPathy, following ten BBD subtypes were included in the study: epithelial proliferation with atypia (EPA, i.e. atypical hyperplasia or dysplasia), epithelial proliferation without atypia (EP, i.e. hyperplasia), adenosis (including sclerosing adenosis), papilloma (single and multiple, mainly specified as intraductal), breast calcifications, fibroadenoma (including giant fibroadenoma, hamartoma, tubular adenoma, and adenoma of the nipple), cysts, fibrocystic changes (FCC; except ‘fibrocystic changes’, the most common included diagnoses were ‘fibrosis’ and ‘cystic fibroadenosis’), inflammation (chronic and granulomatous), and non-epithelial tumors (with lipoma as the most common diagnosis). The classification of the BBD subtypes are according to the latest European guidelines<sup>3</sup> and was done in consultation with an experienced breast pathologist (L.S). For more details, see **eTable 1**.

Breast biopsy records were excluded if being of normal morphology, no diagnosis (or if not enough material for diagnosis), unspecific (e.g. unspecified adenoma or benign tumor), not breast cells (e.g. squamous cells), or likely to have been caused by external factors (e.g. acute inflammation, bleeding, foreign body reaction). Furthermore, breast carcinoma *in situ* (BCIS) and all malignant biopsies or with any suspicion on malignancy (including Paget’s disease) were excluded. If a participant had been diagnosed with the same BBD subtype multiple times, we only considered the first diagnosis. Furthermore, all BBDs diagnosed the same year or after any breast cancer diagnosis were excluded, leaving 7,067 diagnoses for 5,341 unique participants.

### Breast cancer diagnoses

Breast cancer diagnoses were obtained from the National Swedish Cancer Register (Swecan) by the use of the following ICD/ICD-O codes ICD-7 [170, 1701, 1702, 1707-1709], ICD-9 [1741-1744, 1749], ICD-10 [C500-C506, C508, C509] and ICD-O-3 [C500-C506, C508, C509].

### Hormonal factors and covariates from the KARMA questionnaire

All covariates included in the survival analyses were obtained from the web-based questionnaire that the participants took part in upon recruitment. Participants were divided by birth cohort (<1950, 1950-1965, >1965) and BMI was calculated from self-reported height and weight at recruitment and categorized into underweight (BMI<18.5), normal weight (BMI 18.5-25), overweight (BMI >25-30) and obese (BMI>30.0).

### Educational level

The participants were asked for their highest educational level, choosing between compulsory elementary school (nine-year ‘grundskola’), the previous Swedish elementary school system ‘folkskola’ or ‘realskola’, upper secondary school (gymnasium), and university, or provide another written answer. All written answers (n=8,521) were reviewed and categorized into if the participant had attended university or not. Alternative post-secondary courses, including ‘komvux’ (municipal adult education), ‘folkhögskola’ and ‘yrkeshögskola’ (higher vocational education), were not considered university-level education. Instead, if the participant had provided their profession and if university education was required for the job (according to today’s requirements) they were categorized as having attended university (e.g. nurse, midwife, teacher), and otherwise not (e.g. assistant nurse or secretary). If the written answer was unspecific (e.g. post-secondary education [eftergymnasial utbildning]) they were categorized as of unknown educational level.

### Age at menarche

Age at menarche was extracted from the age the participants stated they had their first menstrual period, and categorized as <12, 12-14, and >14.

### Menstrual cycle regularity and length

The participants were asked if they during their adult-life have had periods each month and if they were able to predict the first day of their period with an accuracy of 5 days, and categorized as having regular or irregular cycles. Further, participants with regular cycles were asked how many days they usually had in between their periods. The pre-defined options for cycle length were ≤22, 23-26, 27-30, 31-34, 35-38, and ≥39 days. In the study, cycle length was categorized as <27 days, 27-30 days, and >30 days.

### Parity, age at first birth and duration of breastfeeding

For the parity-related factors, participants were firstly asked how many children they had given birth to and for each delivered child they were further asked for the birth year and time breastfeeding. Two or more identical

birth years (e.g. twins or triplets) were added to the parity as multiple births, and only the maximum provided time breastfeeding was used. Parity was categorized as 0, 1, 2 or  $\geq 3$  children and age at first birth was categorized as  $<23$ , 23-32, and  $>32$ . The pre-defined options for breastfeeding duration in the questionnaire were 0,  $<1$ , 1-6, 7-12, or  $>12$  months breastfeeding. These options were re-coded as 0, 0.5, 3.5, 9.5, and 12.1 months. The cumulative breastfeeding duration, i.e. the total sum of the breastfeeding time for all children, was calculated. For multiple births (e.g. twins or triplets) only the maximum provided time breastfeeding was used in the calculation. Breastfeeding duration was analyzed in the categories 0-3, 3-12, and  $>12$  months.

#### Oral contraceptives

The assessment on oral hormonal contraceptives included combination pills (contains progestin and estrogen) and mini pills (contains only progestin). In the questionnaire, the participants could choose between following pre-defined contraceptives: combination pills, mini pills, injection, implant, hormonal, copper or other kind of IUD, or others, where they were asked to provide a written answer. All written answers ( $n=2,515$ ) were reviewed and categorized into if they were oral contraceptives or not.<sup>4-7</sup> Ever use of oral contraceptives were determined from if the participant had selected combination or mini pills from the pre-defined list or provided an oral contraceptive in the written answer.

For each selected contraceptive, including the written answer, the participants were further asked to provide age at start and duration of use. The pre-defined options in the questionnaire for duration were 0-3 months, 3-24 months, 2-5 years, 6-10 years, 11-15 years, 16-20 years, and more than 20 years. The options were re-coded as 0, 1, 3.5, 8, 13, 18, and 21 years. For each oral contraceptive, the start age and stop age (calculated as duration added to the start age) were extracted. Oral contraceptive use was analyzed by status of use (never use, ever use, current use, previous use) and duration. Current use included up to 4 years since stop and previous use was defined as 5 or more years since stop. The duration was split by 8 years, since this was the median duration use of oral contraceptives in the KARMA cohort.

#### Hormone replacement therapy (HRT)

The use of HRT in the form of oral tablets was assessed in this study. Participants were asked if they ever had used hormones for another purpose than for contraceptive use, and divided into if they had used hormones for the menopause (defined by either a clearly defined answer due to menopause or removal of both ovaries) or unknown reason. Participants that only had used hormones for other reasons than the menopause were set as not taken HRT. Participants were further asked to provide what kind of hormonal treatment they had taken, choosing between tablets, local treatments, patch, and injections. Participants that selected hormonal tablets were further asked to indicate which tablets they had used from a pre-defined list of 25 different HRT tablets or to provide a written answer. All written answers ( $n=1,914$ ) were reviewed.

Participants that had used hormones for the menopause and that had selected an HRT tablet or provided an HRT tablet in their written answer were classified as having used HRT. If the reason for the hormonal treatment was less clear, the participants were classified after review of which tablet(s) they had selected or provided in writing (this was done in consultation with an experienced gynecologist K.R-W.). If they only had selected tablets that might be used for other reason than menopause (for instance, progestin-only tablets can also be used to regulate heavy bleeding, treatment of endometriosis, or in infertility treatment, and estradiol-only tablets can be used in frozen embryo transfer<sup>4,6,8-10</sup>) the HRT usage was set as unknown. If they on the other hand had selected tablet(s) that are mainly/only used for HRT, they were classified as taken HRT. The HRT use for participants that did not specify which tablet(s) they had used was set as unknown, since many non-hormonal tablets can be used for menopausal problems.

Furthermore, participants were asked to provide which year they started and stopped taking HRT and the total duration. The pre-defined options for the duration was 'less than 1 year', followed by 1-year intervals between 1-25 years, as well as  $>25$  years. The ' $<1$  year'-option was re-coded as 0 years (since this can mean anything between a very short period to 12 months). Similar to oral contraceptives, HRT was analyzed by the status of use (never use, ever use, current use up to 4 years since stop, previous use  $\geq 5$  years since stop) and duration. The duration was split by 5 years, since it was more common to use HRT for a few years.

#### Family history of breast cancer

The participants were asked whether any of their biological parent or siblings had been diagnosed with breast cancer, and to estimate at which age they were diagnosed. From this, the information on whether the participant's mother or any full sister had been diagnosed with breast cancer was extracted. If age at diagnosis was missing for the mother or sister it was set as 65.

### Time-varying covariates

The risk of BBDs by hormonal factors and family history of breast cancer was assessed by Cox proportional hazard regression with time-varying covariates,<sup>11</sup> using R function ‘tmerge’ from package ‘survival’. For instance, parity was allowed to change over time (age) by the participants age at birth for each child. Before a participant's age at first birth, she was categorized as nulliparous, which was changed to a parity of 1 when she gave birth to her first child, which was changed to a parity of 2 when she gave birth to her second child, etc. Total cumulative breastfeeding duration was allowed to change over time in a similar way, by the use of the participants' age at birth and duration of breastfeeding for each child. For oral contraceptives and HRT, the status of use (never use, ever use, current use, previous use) and duration were allowed to change by the information on age at start, duration, and age at stop. Furthermore, family history of breast cancer was allowed to change at the age when the participant's mother or sister had been diagnosed with breast cancer. Given that we don't have the information on age at birth for the participants' mothers, one generation was approximated to 30 years, i.e. the mother was considered as being 30 years older than the participant. Sisters were approximated to the same age as the participant, assuming a similar probability of younger and older sisters.

## Supplemental References

1. World Health Organization. *International Classification of Diseases for Oncology (ICD-O)*. Third ed. 2013.
2. SNOMED International. Leading healthcare terminology, worldwide. Accessed April 2020, <https://www.snomed.org>
3. Writing Group for NHS Breast Screening Programme and the Royal College of Pathologists. *Pathology reporting of breast disease in surgical excision specimens incorporating the dataset for histological reporting of breast cancer*. 2016.
4. Bergendal A. *Venous thromboembolism in women : an assessment of hormonal, genetic and other risk factors*. Karolinska Institutet; 2013. <https://openarchive.ki.se/xmlui/handle/10616/41511>
5. Dumeaux V, Alsaker E, Lund E. Breast cancer and specific types of oral contraceptives: a large Norwegian cohort study. *International journal of cancer*. Jul 20 2003;105(6):844-50. doi:10.1002/ijc.11167
6. FASS. Accessed March 2020, <https://www.fass.se/LIF/startpage>
7. IARC Working Group on the Evaluation of Carcinogenic Risks to Humans. Combined estrogen-progestogen contraceptives and combined estrogen-progestogen menopausal therapy. *IARC monographs on the evaluation of carcinogenic risks to humans*. 2007;91:1-528.
8. Behandling med HRT. Behandlingsrekommendationer (Treatment with HRT. Therapeutic recommendations). *Information från Läkemedelsverket*. 2004;15(3)
9. Persson I, Adami HO, Lindberg BS, Johansson ED, Manell P. Practice and patterns of estrogen treatment in climacteric women in a Swedish population. A descriptive epidemiological study. Part I. *Acta obstetrica et gynecologica Scandinavica*. 1983;62(4):289-96. doi:10.3109/00016348309156224
10. The Swedish Council on Technology Assessment in Health Care. Behandling med östrogen (Treatment with estrogen). 2002;
11. Zhang Z, Reinikainen J, Adeleke KA, Pieterse ME, Groothuis-Oudshoorn CGM. Time-varying covariates and coefficients in Cox regression models. *Annals of translational medicine*. Apr 2018;6(7):121. doi:10.21037/atm.2018.02.12

**eTable 1. Classification of benign breast diseases (BBDs).** The BBD diagnoses of breast biopsies for the KARMA obtained from the pathology medical record system SymPathy.

| <b>BBD subtype</b>                      | <b>Diagnosis codes</b>            | <b>Diagnosis text</b>                  |
|-----------------------------------------|-----------------------------------|----------------------------------------|
| Epithelial proliferation with atypia    | M49061, M49251                    | Radial scar                            |
|                                         | M697, M69700, M69701, M69030      | Atypia                                 |
|                                         | M69706                            | Atypia light                           |
|                                         | M69707                            | Atypia moderate                        |
|                                         | M69708                            | Atypia strong                          |
|                                         | M6972, M69720                     | Atypical columnar cell change          |
|                                         | M69726                            | Atypical columnar cell change light    |
|                                         | M69727                            | Atypical columnar cell change moderate |
|                                         | M69728                            | Atypical columnar cell change strong   |
|                                         | M6978, M69780                     | Inflammatory atypia                    |
|                                         | M72005                            | Atypical hyperplasia                   |
|                                         | M72105                            | Atypical hyperplasia lobular           |
|                                         | M72175                            | Atypical hyperplasia ductal            |
|                                         | M72425, M74245                    | Atypical hyperplasia adenomatous       |
|                                         | M74, M74000                       | Dysplasia                              |
|                                         | M74006                            | Dysplasia light                        |
|                                         | M74007                            | Dysplasia moderate                     |
|                                         | M74008                            | Dysplasia strong                       |
|                                         | M74300                            | Dysplasia cystic                       |
|                                         | M74325                            | Atypical cystic fibroadenosis          |
| M76085                                  | Atypical epithelial proliferation |                                        |
| Epithelial proliferation without atypia | M72, M72000                       | Hyperplasia                            |
|                                         | M721, M72100                      | Hyperplasia lobular                    |
|                                         | M72170                            | Hyperplasia intraductal                |
|                                         | M722, M72200                      | Hyperplasia lymphoid                   |
|                                         | M7242                             | Adenomatous hyperplasia                |
|                                         | M7248                             | Hyperplasia microglandular             |
|                                         | M76, M76000                       | Proliferation                          |
|                                         | M7608, M76080                     | Epithelial proliferation               |
|                                         | M85000                            | Ductal epithelial proliferation benign |
| Adenosis                                | M74200                            | Adenosis                               |
|                                         | M7422, M74220                     | Adenosis sclerosing                    |
|                                         | M74240                            | Adenosis blunt duct                    |
|                                         | M7426, M74260                     | Adenosis florid                        |
| Papilloma                               | M80500                            | Papilloma                              |
|                                         | M82600                            | Papillary adenoma                      |
|                                         | M8503, M85030                     | Intraductal papilloma                  |
|                                         | M85031                            | Suspected intraductal papilloma        |
|                                         | M85050                            | Papillomas / Intraductal Papillomas    |
|                                         | M89830                            | Adenomyoepitheliom                     |
| Calcifications                          | M554, M55400                      | Calcifications                         |
| Fibroadenoma                            | M755, M75500                      | Hamartoma                              |
|                                         | M82100                            | Adenoma tubular                        |
|                                         | M85060                            | Adenoma of the nipple                  |
|                                         | M90100                            | Fibroadenoma                           |

|                       |                     |                                         |
|-----------------------|---------------------|-----------------------------------------|
|                       | M90200              | Giant fibroadenoma                      |
| Fibrocystic changes   | M321, M32100        | Duct ectasia                            |
|                       | M332, M33200        | Mucocele                                |
|                       | M3322, M33220       | Galactocoele                            |
|                       | M49, M49000, M49001 | Fibrosis                                |
|                       | M73, M73000         | Metaplasia                              |
|                       | M7305, M73050       | Metaplasia oxyphil cells / oncocytic    |
|                       | M73310              | Apocrine metaplasia                     |
|                       | M7432, M74320       | Fibrocystic changes                     |
|                       | M743, M74300        | Cystic fibroadenosis                    |
|                       | M761, M76100        | Fibromatosis                            |
| Cyst                  | M4717, M47170       | Lymphocytic infiltration of cells       |
|                       | M33, M33000, M33300 | Retention                               |
|                       | M334, M33400        | Cyst                                    |
|                       | M33420              | Epithelial cyst                         |
| Inflammation          | M421, M42100        | Inflammation acute and chronic          |
|                       | M43, M43000         | Inflammation chronic                    |
|                       | M44, M44000         | Inflammation granulomatous              |
|                       | M44110              | Reparative giant cells granuloma        |
|                       | M44200              | Inflammation granulomatous not necrotic |
|                       | M47000              | Infiltration of inflammatory cells      |
| Non-epithelial tumors | M4444               | Granuloma telangiect                    |
|                       | M88100              | Fibroma                                 |
|                       | M88300              | Fibrous histiocytoma                    |
|                       | M88320              | Dermatofibroma                          |
|                       | M88500              | Lipoma                                  |
|                       | M88510              | Fibrolipoma                             |
|                       | M88800              | Hibernoma                               |
|                       | M88900              | Leiomyoma                               |
|                       | M91200              | Hemangioma                              |
|                       | M91210              | Hemangioma cavernous                    |
|                       | M95400              | Neurofibroma                            |
| M95600                | Neurilemmoma        |                                         |

**eTable 2. Baseline characteristics at time of recruitment of the KARMA participants included in the study.**

| <b>Baseline characteristics</b>                     | <b>KARMA study<br/>(n=61,617)</b> |
|-----------------------------------------------------|-----------------------------------|
| <b>Age at baseline</b> , mean (sd)                  | 53.8 (8.9)                        |
| <b>Birth cohort</b> , No (%)                        |                                   |
| < 1950                                              | 14338 (23.3)                      |
| 1950 - 1965                                         | 29034 (47.1)                      |
| > 1965                                              | 18245 (29.6)                      |
| Missing                                             | 0 (-)                             |
| <b>KARMA unit</b> , No (%)                          |                                   |
| Södersjukhuset                                      | 31452 (51.0)                      |
| Helsingborg                                         | 16784 (27.2)                      |
| Lund                                                | 8298 (13.5)                       |
| Landskrona                                          | 5083 (8.2)                        |
| Missing                                             | 0 (-)                             |
| <b>Educational level</b> , No (%)                   |                                   |
| University                                          | 32209 (54.5)                      |
| Elementary/Intermediate                             | 26846 (45.5)                      |
| Unknown                                             | 2562 (-)                          |
| <b>Age at menarche</b> , No (%)                     |                                   |
| < 12                                                | 7996 (13.3)                       |
| 12 - 14                                             | 42772 (71.4)                      |
| > 14                                                | 9143 (15.3)                       |
| Missing                                             | 1706 (-)                          |
| <b>Menstrual cycle patterns</b> , No (%)            |                                   |
| Irregular cycles                                    | 7178 (12.8)                       |
| Regular cycles                                      | 48879 (87.2)                      |
| Missing                                             | 5560 (-)                          |
| <i>Cycle length</i>                                 |                                   |
| < 27 days                                           | 11753 (24.0)                      |
| 27 - 30 days                                        | 32140 (65.8)                      |
| > 30 days                                           | 4986 (10.2)                       |
| <b>Parity</b> , No (%)                              |                                   |
| Nulliparous                                         | 7821 (12.8)                       |
| Parous                                              | 53194 (87.2)                      |
| Missing                                             | 602 (-)                           |
| <i>Number of children</i>                           |                                   |
| 1 child                                             | 9037 (17.0)                       |
| 2 children                                          | 29177 (54.9)                      |
| ≥3 children                                         | 14980 (28.2)                      |
| <b>Age at first birth</b> <sup>a</sup> , No (%)     |                                   |
| < 23                                                | 10601 (19.9)                      |
| 23 - 32                                             | 33703 (63.4)                      |
| > 32                                                | 8890 (16.7)                       |
| Missing                                             | 602 (-)                           |
| <b>Breastfeeding duration</b> <sup>a</sup> , No (%) |                                   |
| < 3 months                                          | 4369 (8.2)                        |
| 3 - 12 months                                       | 21774 (41.1)                      |
| > 12 months                                         | 26870 (50.7)                      |
| Missing                                             | 783 (-)                           |
| <b>BMI</b> , No (%)                                 |                                   |



|                                                                                  |              |
|----------------------------------------------------------------------------------|--------------|
| Underweight (< 18.5 kg/m <sup>2</sup> )                                          | 610 (1.0)    |
| Normal (18.5 - 25.0 kg/m <sup>2</sup> )                                          | 33508 (55.0) |
| Overweight (25.1 - 30.0 kg/m <sup>2</sup> )                                      | 19006 (31.2) |
| Obese (> 30 kg/m <sup>2</sup> )                                                  | 7774 (12.8)  |
| Missing                                                                          | 719 (-)      |
| <b>Oral contraceptives, No (%)</b>                                               |              |
| No                                                                               | 10942 (18.0) |
| Yes                                                                              | 49926 (82.0) |
| Missing                                                                          | 749 (-)      |
| <i>Duration</i>                                                                  |              |
| 1 - 5 years                                                                      | 16544 (35.1) |
| 6 - 10 years                                                                     | 16440 (34.9) |
| > 10 years                                                                       | 14148 (30.0) |
| Unknown                                                                          | 2794 (-)     |
| <i>Type</i>                                                                      |              |
| Estrogen + progestin                                                             | 44725 (89.8) |
| Progestin                                                                        | 5069 (10.2)  |
| Unknown                                                                          | 132 (-)      |
| <b>HRT, No (%)</b>                                                               |              |
| No                                                                               | 50989 (88.4) |
| Yes                                                                              | 6696 (11.6)  |
| Missing                                                                          | 3932 (-)     |
| <i>Duration</i>                                                                  |              |
| 1 - 5 years                                                                      | 2513 (45.8)  |
| 6 - 10 years                                                                     | 1673 (30.5)  |
| > 10 years                                                                       | 1304 (23.8)  |
| Unknown                                                                          | 1206 (-)     |
| <i>Type</i>                                                                      |              |
| Estrogen + progestin                                                             | 4475 (66.8)  |
| Estrogen only                                                                    | 1394 (20.8)  |
| Progestin only                                                                   | 359 (5.4)    |
| Tibolone only                                                                    | 468 (7.0)    |
| Unknown                                                                          | 0 (-)        |
| <b>Family history of breast cancer, No (%)</b>                                   |              |
| Yes                                                                              | 7604 (12.9)  |
| No                                                                               | 51524 (87.1) |
| Missing                                                                          | 2489 (-)     |
| <sup>a</sup> Age at first birth and breastfeeding duration only for parous women |              |

**eTable 3A. Age incidence rates per 100 000 person-years in KARMA.**

| Age | Epithelial proliferation with atypia |                 | Epithelial proliferation without atypia |                 | Fibroadenoma |                 | Fibrocystic changes |                 | Cyst  |                 |
|-----|--------------------------------------|-----------------|-----------------------------------------|-----------------|--------------|-----------------|---------------------|-----------------|-------|-----------------|
|     | Cases                                | Incidence rates | Cases                                   | Incidence rates | Cases        | Incidence rates | Cases               | Incidence rates | Cases | Incidence rates |
| 25  | 6                                    | 15              | 13                                      | 32              | 18           | 45              | 17                  | 42              | 3     | 7               |
| 26  | 7                                    | 17              | 14                                      | 33              | 11           | 26              | 23                  | 55              | 3     | 7               |
| 27  | 2                                    | 5               | 15                                      | 34              | 9            | 21              | 14                  | 32              | 8     | 18              |
| 28  | 4                                    | 9               | 8                                       | 18              | 12           | 26              | 35                  | 77              | 9     | 20              |
| 29  | 3                                    | 6               | 12                                      | 25              | 14           | 30              | 24                  | 51              | 20    | 42              |
| 30  | 2                                    | 4               | 14                                      | 28              | 20           | 41              | 16                  | 33              | 20    | 41              |
| 31  | 8                                    | 16              | 23                                      | 45              | 18           | 35              | 34                  | 66              | 12    | 23              |
| 32  | 6                                    | 11              | 14                                      | 26              | 15           | 28              | 49                  | 92              | 15    | 28              |
| 33  | 6                                    | 11              | 20                                      | 36              | 20           | 36              | 59                  | 107             | 28    | 51              |
| 34  | 13                                   | 23              | 13                                      | 23              | 24           | 42              | 67                  | 117             | 19    | 33              |
| 35  | 10                                   | 17              | 25                                      | 42              | 27           | 46              | 74                  | 125             | 23    | 39              |
| 36  | 7                                    | 12              | 39                                      | 64              | 30           | 49              | 60                  | 99              | 27    | 44              |
| 37  | 12                                   | 19              | 28                                      | 45              | 28           | 45              | 80                  | 130             | 31    | 50              |
| 38  | 18                                   | 29              | 34                                      | 55              | 34           | 55              | 77                  | 125             | 32    | 52              |
| 39  | 16                                   | 26              | 39                                      | 63              | 27           | 44              | 80                  | 130             | 38    | 62              |
| 40  | 23                                   | 37              | 34                                      | 55              | 50           | 81              | 86                  | 140             | 62    | 101             |
| 41  | 23                                   | 37              | 29                                      | 47              | 48           | 78              | 94                  | 153             | 48    | 78              |
| 42  | 32                                   | 52              | 50                                      | 81              | 52           | 85              | 112                 | 182             | 68    | 111             |
| 43  | 28                                   | 46              | 51                                      | 84              | 33           | 54              | 115                 | 188             | 86    | 141             |
| 44  | 36                                   | 61              | 35                                      | 59              | 45           | 76              | 109                 | 185             | 98    | 167             |
| 45  | 43                                   | 76              | 36                                      | 64              | 45           | 80              | 101                 | 179             | 97    | 172             |
| 46  | 32                                   | 59              | 49                                      | 90              | 53           | 98              | 97                  | 179             | 110   | 202             |
| 47  | 33                                   | 63              | 36                                      | 69              | 41           | 79              | 91                  | 175             | 107   | 205             |

|                                                |     |    |     |    |     |    |      |     |     |     |
|------------------------------------------------|-----|----|-----|----|-----|----|------|-----|-----|-----|
| 48                                             | 24  | 48 | 34  | 68 | 33  | 66 | 71   | 142 | 108 | 216 |
| 49                                             | 25  | 53 | 28  | 59 | 26  | 55 | 64   | 135 | 95  | 200 |
| 50                                             | 22  | 49 | 35  | 78 | 30  | 67 | 57   | 126 | 122 | 271 |
| 51                                             | 27  | 63 | 35  | 82 | 15  | 35 | 51   | 120 | 83  | 195 |
| 52                                             | 18  | 45 | 28  | 70 | 15  | 37 | 38   | 95  | 86  | 215 |
| 53                                             | 18  | 48 | 23  | 61 | 9   | 24 | 33   | 87  | 52  | 137 |
| 54                                             | 14  | 39 | 18  | 51 | 9   | 25 | 30   | 84  | 50  | 141 |
| 55                                             | 11  | 33 | 6   | 18 | 8   | 24 | 22   | 65  | 31  | 92  |
| 56                                             | 10  | 32 | 6   | 19 | 4   | 13 | 17   | 54  | 25  | 79  |
| 57                                             | 7   | 24 | 7   | 24 | 6   | 20 | 17   | 57  | 24  | 81  |
| 58                                             | 8   | 29 | 9   | 32 | 3   | 11 | 14   | 51  | 19  | 69  |
| 59                                             | 5   | 19 | 7   | 27 | 1   | 4  | 9    | 35  | 9   | 35  |
| 60                                             | 1   | 4  | 4   | 17 | 1   | 4  | 7    | 29  | 18  | 75  |
| 61                                             | 13  | 59 | 8   | 36 | 4   | 18 | 5    | 23  | 12  | 54  |
| 62                                             | 5   | 24 | 7   | 34 | 2   | 10 | 5    | 24  | 6   | 29  |
| 63                                             | 4   | 21 | 3   | 16 | 0   | 0  | 4    | 21  | 5   | 27  |
| 64                                             | 4   | 24 | 3   | 18 | 3   | 18 | 6    | 35  | 5   | 29  |
| 65                                             | 3   | 20 | 0   | 0  | 3   | 20 | 5    | 33  | 9   | 59  |
| 66                                             | 3   | 22 | 2   | 15 | 0   | 0  | 3    | 22  | 2   | 15  |
| 67                                             | 1   | 9  | 2   | 17 | 0   | 0  | 3    | 26  | 3   | 26  |
| 68                                             | 2   | 21 | 0   | 0  | 1   | 10 | 1    | 10  | 2   | 21  |
| 69                                             | 0   | 0  | 0   | 0  | 0   | 0  | 2    | 26  | 2   | 26  |
| <b>Premenopausal ages, total nr of cases:</b>  |     |    |     |    |     |    |      |     |     |     |
| 25-44                                          | 262 |    | 510 |    | 535 |    | 1225 |     | 650 |     |
| <b>Perimenopausal ages, total nr of cases:</b> |     |    |     |    |     |    |      |     |     |     |
| 45-54                                          | 256 |    | 322 |    | 276 |    | 633  |     | 910 |     |
| <b>Postmenopausal ages, total nr of cases:</b> |     |    |     |    |     |    |      |     |     |     |

|       |    |    |    |     |     |
|-------|----|----|----|-----|-----|
| 55-69 | 77 | 64 | 36 | 120 | 172 |
|-------|----|----|----|-----|-----|

**eTable 3B. Age incidence rates per 100 000 person-years in KARMA.**

| Age | Adenosis |                 | Papilloma |                 | Calcification |                 | Inflammation |                 | Non-epithelial tumors |                 |
|-----|----------|-----------------|-----------|-----------------|---------------|-----------------|--------------|-----------------|-----------------------|-----------------|
|     | Cases    | Incidence rates | Cases     | Incidence rates | Cases         | Incidence rates | Cases        | Incidence rates | Cases                 | Incidence rates |
| 25  | 1        | 2               | 0         | 0               | 0             | 0               | 0            | 0               | 0                     | 0               |
| 26  | 4        | 10              | 0         | 0               | 0             | 0               | 0            | 0               | 0                     | 0               |
| 27  | 3        | 7               | 0         | 0               | 0             | 0               | 2            | 5               | 1                     | 2               |
| 28  | 2        | 4               | 1         | 2               | 0             | 0               | 2            | 4               | 2                     | 4               |
| 29  | 1        | 2               | 0         | 0               | 0             | 0               | 2            | 4               | 0                     | 0               |
| 30  | 7        | 14              | 0         | 0               | 1             | 2               | 2            | 4               | 1                     | 2               |
| 31  | 7        | 14              | 0         | 0               | 0             | 0               | 1            | 2               | 2                     | 4               |
| 32  | 5        | 9               | 3         | 6               | 0             | 0               | 1            | 2               | 1                     | 2               |
| 33  | 11       | 20              | 1         | 2               | 0             | 0               | 0            | 0               | 1                     | 2               |
| 34  | 3        | 5               | 0         | 0               | 0             | 0               | 3            | 5               | 3                     | 5               |
| 35  | 6        | 10              | 3         | 5               | 0             | 0               | 3            | 5               | 4                     | 7               |
| 36  | 7        | 12              | 3         | 5               | 0             | 0               | 3            | 5               | 4                     | 7               |
| 37  | 9        | 15              | 6         | 10              | 0             | 0               | 2            | 3               | 1                     | 2               |
| 38  | 9        | 15              | 2         | 3               | 0             | 0               | 0            | 0               | 3                     | 5               |
| 39  | 7        | 11              | 1         | 2               | 0             | 0               | 1            | 2               | 3                     | 5               |
| 40  | 12       | 20              | 4         | 7               | 2             | 3               | 2            | 3               | 2                     | 3               |
| 41  | 12       | 20              | 6         | 10              | 3             | 5               | 3            | 5               | 6                     | 10              |
| 42  | 16       | 26              | 5         | 8               | 1             | 2               | 4            | 7               | 6                     | 10              |
| 43  | 16       | 26              | 8         | 13              | 0             | 0               | 7            | 11              | 4                     | 7               |
| 44  | 13       | 22              | 8         | 14              | 4             | 7               | 3            | 5               | 3                     | 5               |
| 45  | 18       | 32              | 10        | 18              | 3             | 5               | 4            | 7               | 0                     | 0               |
| 46  | 11       | 20              | 10        | 18              | 1             | 2               | 2            | 4               | 7                     | 13              |
| 47  | 8        | 15              | 13        | 25              | 2             | 4               | 2            | 4               | 6                     | 12              |
| 48  | 9        | 18              | 13        | 26              | 3             | 6               | 0            | 0               | 4                     | 8               |

|                                                |     |    |    |    |    |    |    |    |    |    |
|------------------------------------------------|-----|----|----|----|----|----|----|----|----|----|
| <b>49</b>                                      | 19  | 40 | 8  | 17 | 2  | 4  | 2  | 4  | 4  | 8  |
| <b>50</b>                                      | 14  | 31 | 9  | 20 | 3  | 7  | 5  | 11 | 8  | 18 |
| <b>51</b>                                      | 9   | 21 | 3  | 7  | 7  | 16 | 1  | 2  | 4  | 9  |
| <b>52</b>                                      | 8   | 20 | 8  | 20 | 0  | 0  | 5  | 12 | 1  | 2  |
| <b>53</b>                                      | 8   | 21 | 5  | 13 | 3  | 8  | 3  | 8  | 6  | 16 |
| <b>54</b>                                      | 1   | 3  | 3  | 8  | 3  | 8  | 2  | 6  | 6  | 17 |
| <b>55</b>                                      | 2   | 6  | 7  | 21 | 3  | 9  | 0  | 0  | 4  | 12 |
| <b>56</b>                                      | 5   | 16 | 3  | 10 | 0  | 0  | 0  | 0  | 3  | 10 |
| <b>57</b>                                      | 2   | 7  | 5  | 17 | 1  | 3  | 2  | 7  | 3  | 10 |
| <b>58</b>                                      | 2   | 7  | 4  | 14 | 4  | 14 | 1  | 4  | 0  | 0  |
| <b>59</b>                                      | 3   | 12 | 5  | 19 | 2  | 8  | 1  | 4  | 5  | 19 |
| <b>60</b>                                      | 4   | 17 | 1  | 4  | 1  | 4  | 2  | 8  | 3  | 13 |
| <b>61</b>                                      | 2   | 9  | 4  | 18 | 2  | 9  | 0  | 0  | 2  | 9  |
| <b>62</b>                                      | 3   | 15 | 6  | 29 | 2  | 10 | 0  | 0  | 2  | 10 |
| <b>63</b>                                      | 0   | 0  | 4  | 21 | 0  | 0  | 0  | 0  | 2  | 11 |
| <b>64</b>                                      | 3   | 18 | 7  | 41 | 0  | 0  | 1  | 6  | 4  | 24 |
| <b>65</b>                                      | 0   | 0  | 2  | 13 | 0  | 0  | 0  | 0  | 4  | 26 |
| <b>66</b>                                      | 1   | 7  | 4  | 30 | 4  | 30 | 0  | 0  | 0  | 0  |
| <b>67</b>                                      | 0   | 0  | 2  | 17 | 0  | 0  | 0  | 0  | 0  | 0  |
| <b>68</b>                                      | 1   | 10 | 1  | 10 | 3  | 31 | 1  | 10 | 0  | 0  |
| <b>69</b>                                      | 0   | 0  | 2  | 26 | 0  | 0  | 0  | 0  | 0  | 0  |
| <b>Premenopausal ages, total nr of cases:</b>  |     |    |    |    |    |    |    |    |    |    |
| <b>25-44</b>                                   | 151 |    | 51 |    | 11 |    | 41 |    | 47 |    |
| <b>Perimenopausal ages, total nr of cases:</b> |     |    |    |    |    |    |    |    |    |    |
| <b>45-54</b>                                   | 105 |    | 82 |    | 27 |    | 26 |    | 46 |    |
| <b>Postmenopausal ages, total nr of cases:</b> |     |    |    |    |    |    |    |    |    |    |
| <b>55-69</b>                                   | 28  |    | 57 |    | 22 |    | 8  |    | 32 |    |

**eFigure 1. Risk of benign breast diseases (BBDs) by hormonal factors.** Multivariable Cox proportional hazard regression with time-varying covariates using age as the time-scale was used to estimate the risk of BBDs by hormonal factors, adjusting for KARMA unit, birth cohort, and educational level. The hazard ratios (HRs) and their 95% confidence intervals (CIs) are presented in forest plots for each BBD and hormonal factor. The analyses were divided in three age-groups, following women at pre- (25-44), peri- (45-54) and postmenopausal ages (55-69).

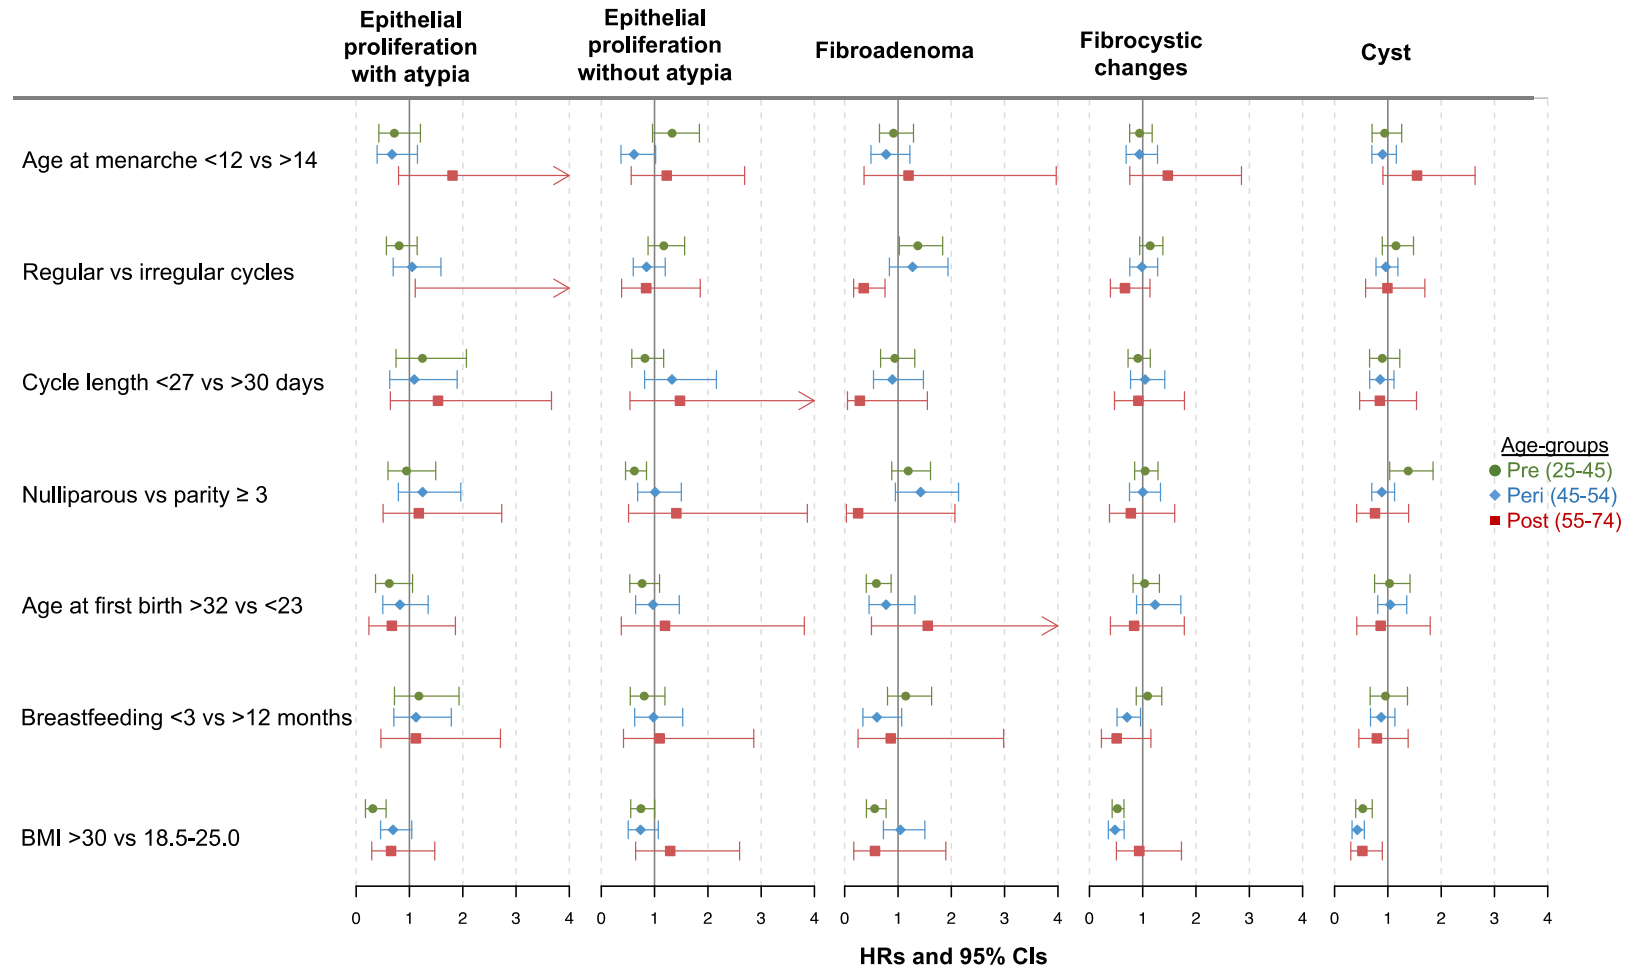

Supplement: jamanetwopen-e2114716-s001.pdf [file jamanetwopen-e2114716-s001.pdf]
